# Supplementary material for: Loss of IGFBP2 mediates alveolar type 2 cell senescence and promotes lung fibrosis
Source: PubMed Central journal article supplement — Cell Rep Med. 2023 Feb 13;4(3):100945. doi: 10.1016/j.xcrm.2023.100945 (PMC10040381; doi:10.1016/j.xcrm.2023.100945), 2023-02-13
Supplement: mmc1.pdf [file mmc1.pdf]

**Cell Reports Medicine, Volume 4**

**Supplemental information**

**Loss of IGFBP2 mediates alveolar type 2 cell  
senescence and promotes lung fibrosis**

**Chiahsuan Chin, Ranjithkumar Ravichandran, Kristina Sanborn, Timothy Fleming, Stephen B. Wheatcroft, Mark T. Kearney, Sofya Tokman, Rajat Walia, Michael A. Smith, David J. Flint, Thalachallour Mohanakumar, Ross M. Bremner, and Angara Sureshbabu**

Supplementary Figures

Figure S1

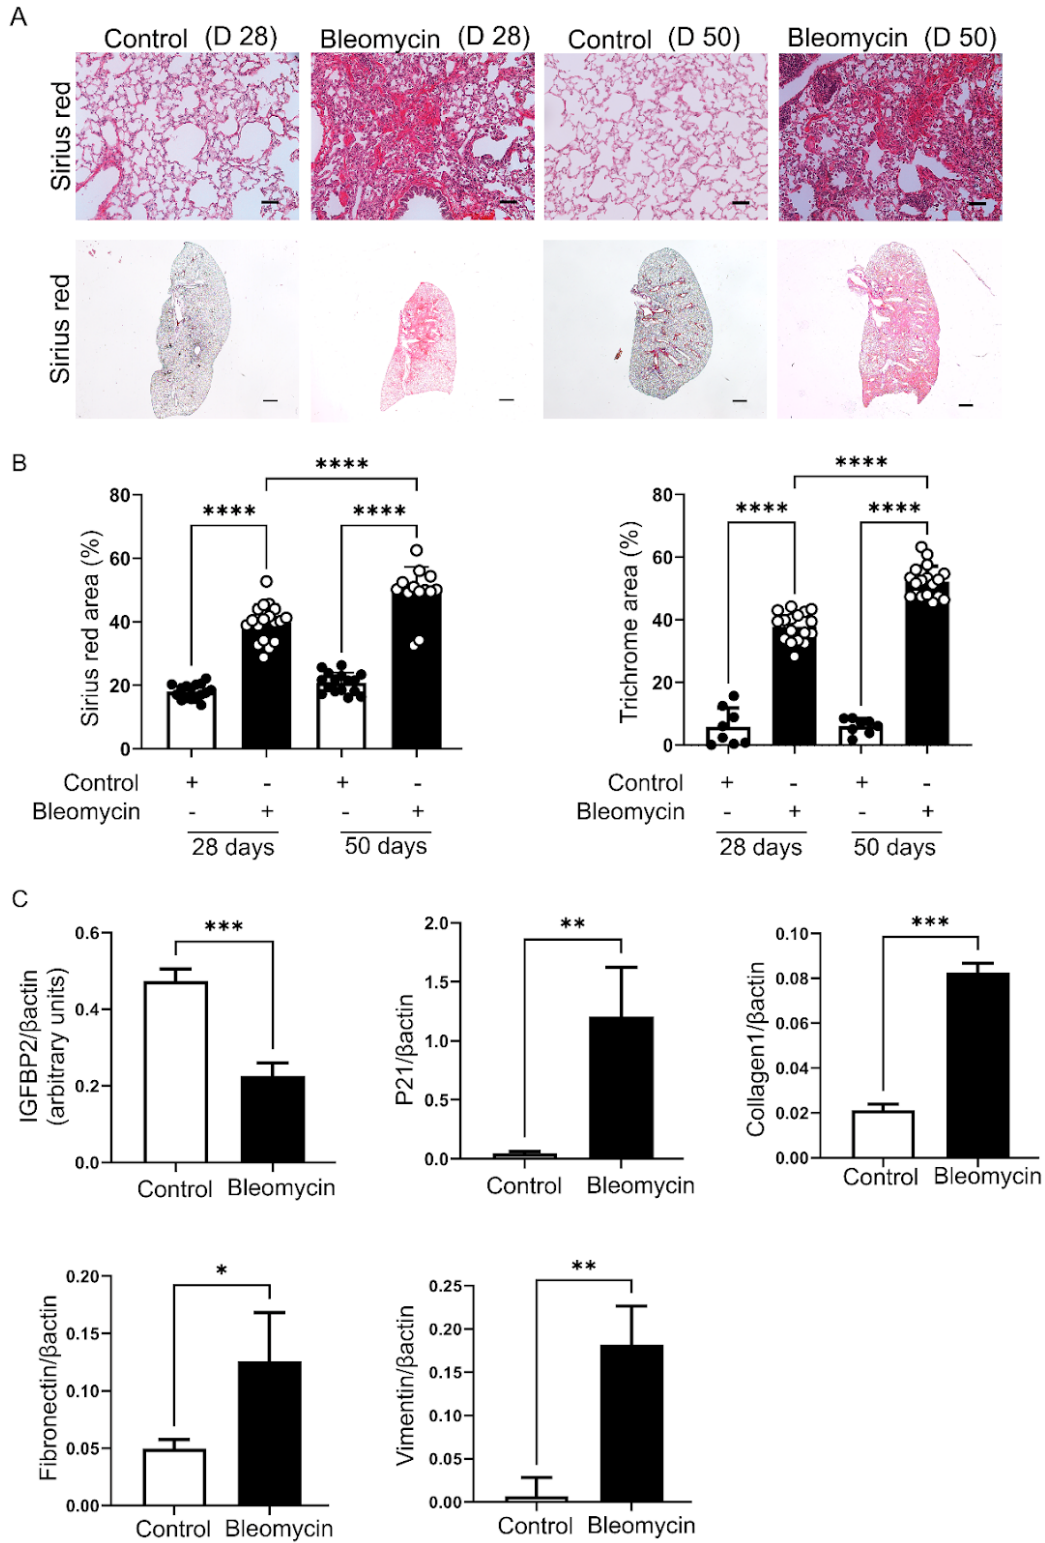

S1. Related to Figure 1B. Low-dose bleomycin induces persistent lung fibrosis in aged mice. (A) Representative images of Sirius red stained lung sections of aged mice 28 or 50 days after intratracheal administration of bleomycin (1U/Kg body weight). Scale bars, 50  $\mu$ m (top); 1 mm (bottom). (n = 8 WT saline; n = 8 WT bleomycin) (B) Quantification of Sirius red (left panel) and trichrome (right panel) staining positive areas (%) in aged mice after bleomycin challenge at 28 and 50 days. \*\*\*\*P < 0.001 one way ANOVA with Tukey post-hoc test. (C) Related to Figure 1C. Densitometric analysis of the Western blot images from Figure 1C. Quantification by densitometric analysis through normalization to  $\beta$ -actin, expressed as fold change relative to control. Data are shown as mean  $\pm$  s.e.m. \*P < 0.05, \*\*P < 0.01, \*\*\*P < 0.001, Student's unpaired two-tailed *t* test.

Figure S2

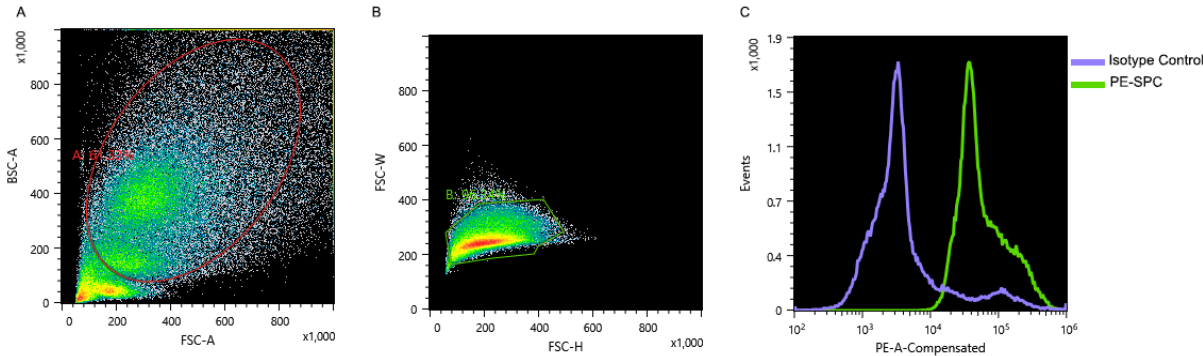

S2. Related to Figure 1G. Flow cytometry staining for Surfactant protein-C (SPC) in primary murine AEC2 cells.

(A) Total murine lung AEC2 cells were isolated using differential cell strainer (20  $\mu$ m) and magnetic sorting

(CD326/EpCAM) followed by staining with PE-SPC antibody. Live AEC2 cells were sorted based on their

forward/side scatter profile. (B) Representative flow cytometric sorting of AEC2 cells based on single cell profile.

(C) The expression level of SPC was revealed based on distinct fluorescence profiles of isotype control and PE-

stained AEC2 cells after overlay. Violet color indicates isotype control AEC2 cells; Green color indicates PE-SPC

stained AEC2 cells.

**Figure S3**

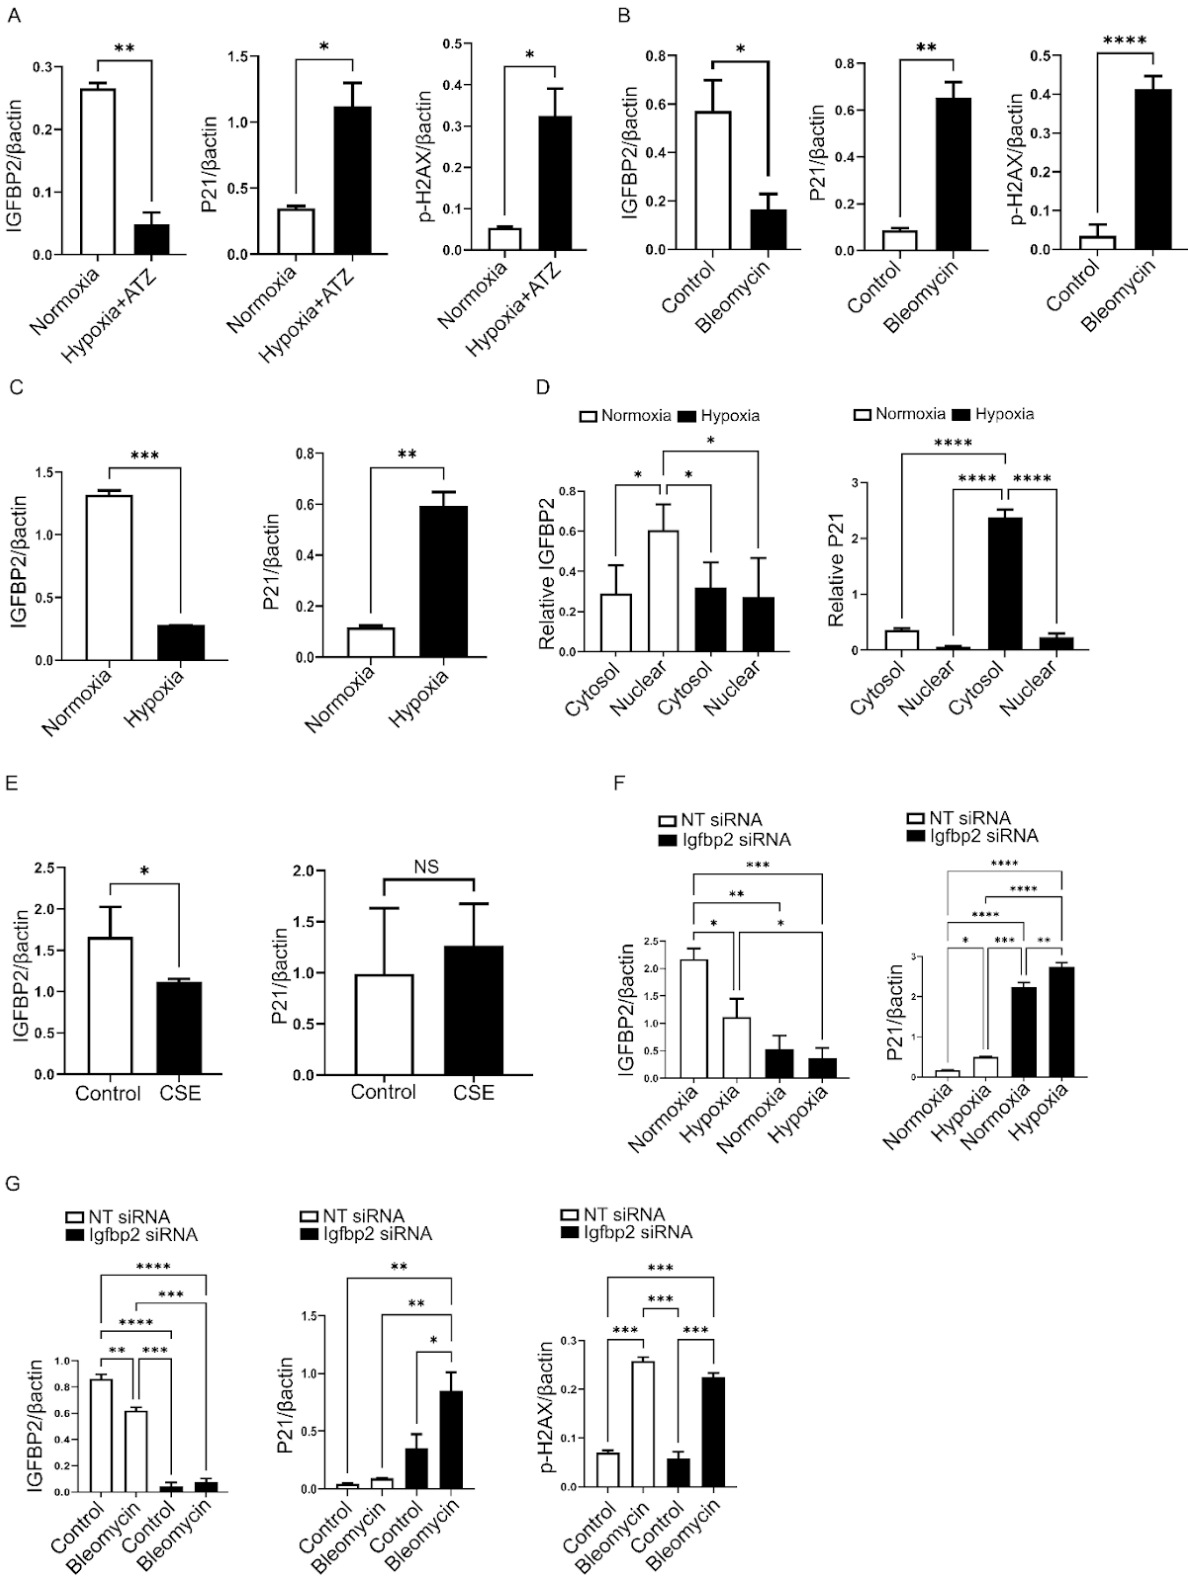

S3A – S3G. Related to Figure 3. Densitometric analysis of the Western blot images from Figures 3A – 3G. The quantification by densitometric analysis through normalization to  $\beta$ -actin or Tubulin or Histone H3, expressed as fold change relative to control. Data are shown as mean  $\pm$  s.e.m. NS, not significant; one-way ANOVA with Tukey post-hoc test (for multiple comparisons) or Student's unpaired two-tailed *t* test (for two comparisons). \*P < 0.05, \*\*P < 0.01, \*\*\*P < 0.001, \*\*\*\*P < 0.0001.

Figure S4

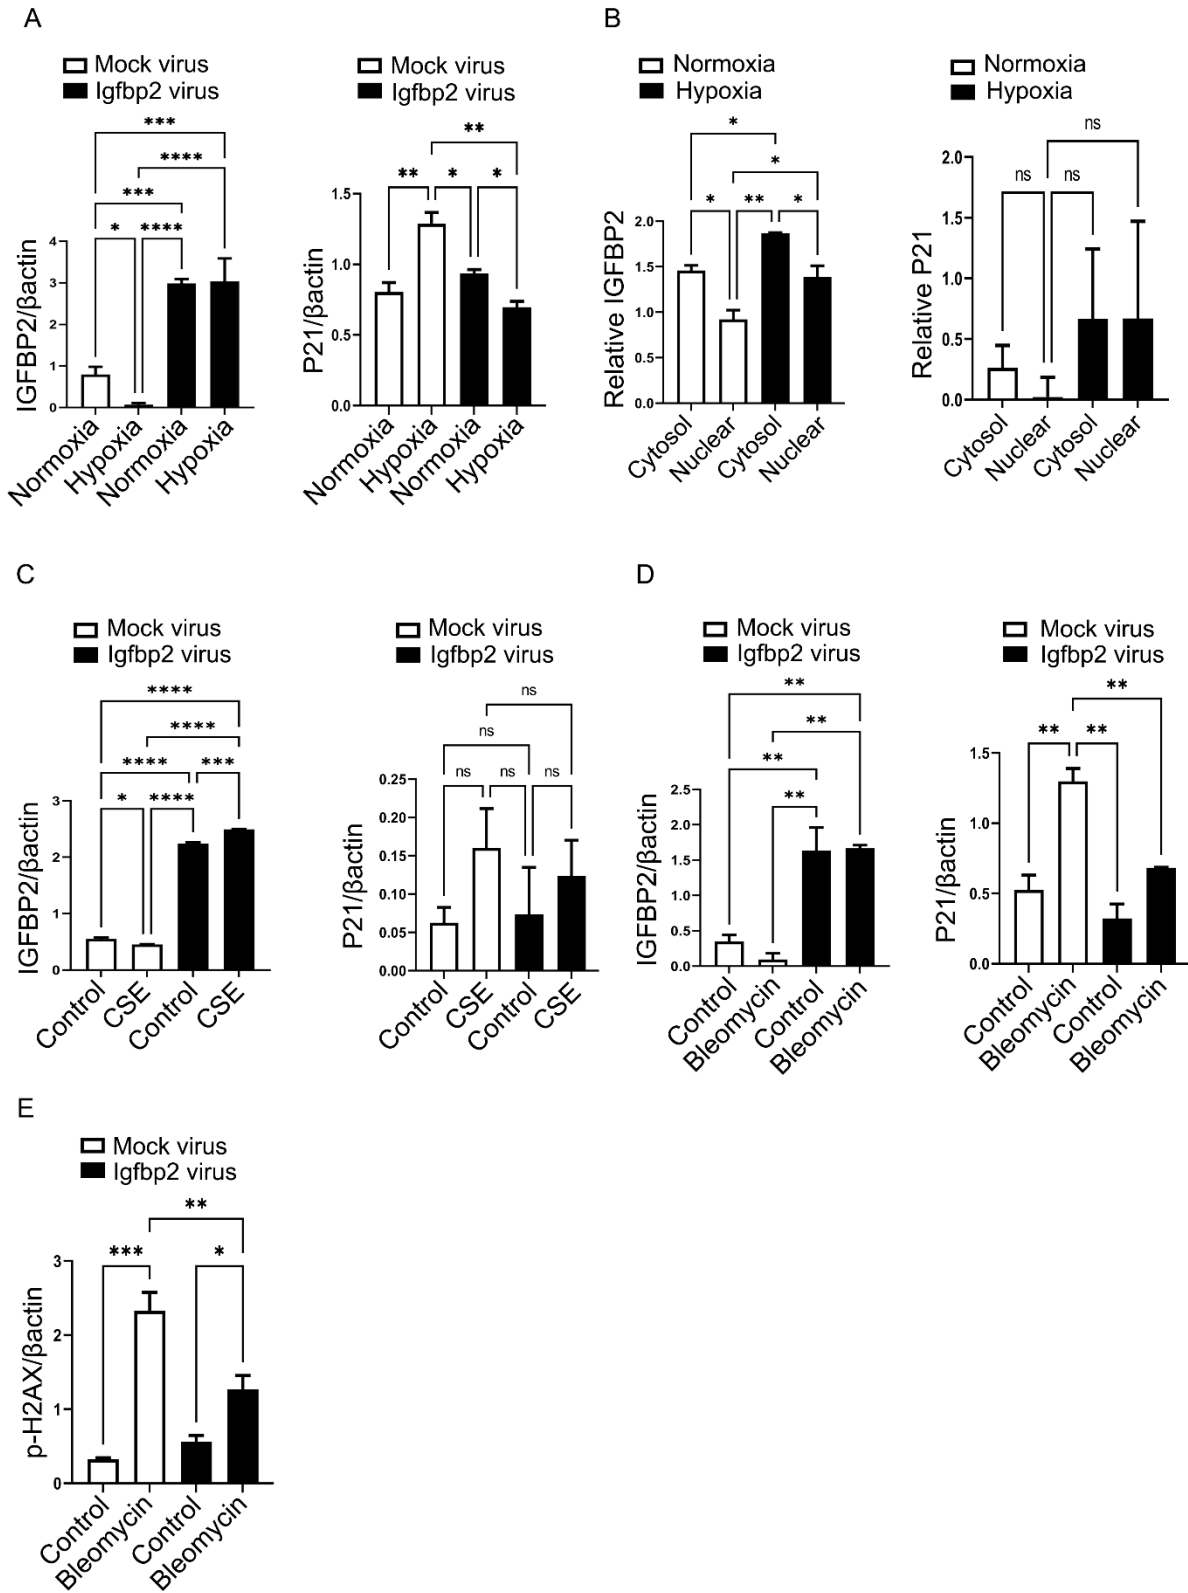



S4A – S4E. Related to Figure 4. Densitometric analysis of the Western blot images from Figures 4A – 4E. The quantification by densitometric analysis through normalization to  $\beta$ -actin or Tubulin or Histone H3, expressed as fold change relative to control. Data are shown as mean  $\pm$  s.e.m. NS, not significant; one-way ANOVA with Tukey post-hoc test (for multiple comparisons) or Student's unpaired two-tailed *t* test (for two comparisons). \*P < 0.05, \*\*P < 0.01, \*\*\*P < 0.001, \*\*\*\*P < 0.0001.

Figure S5

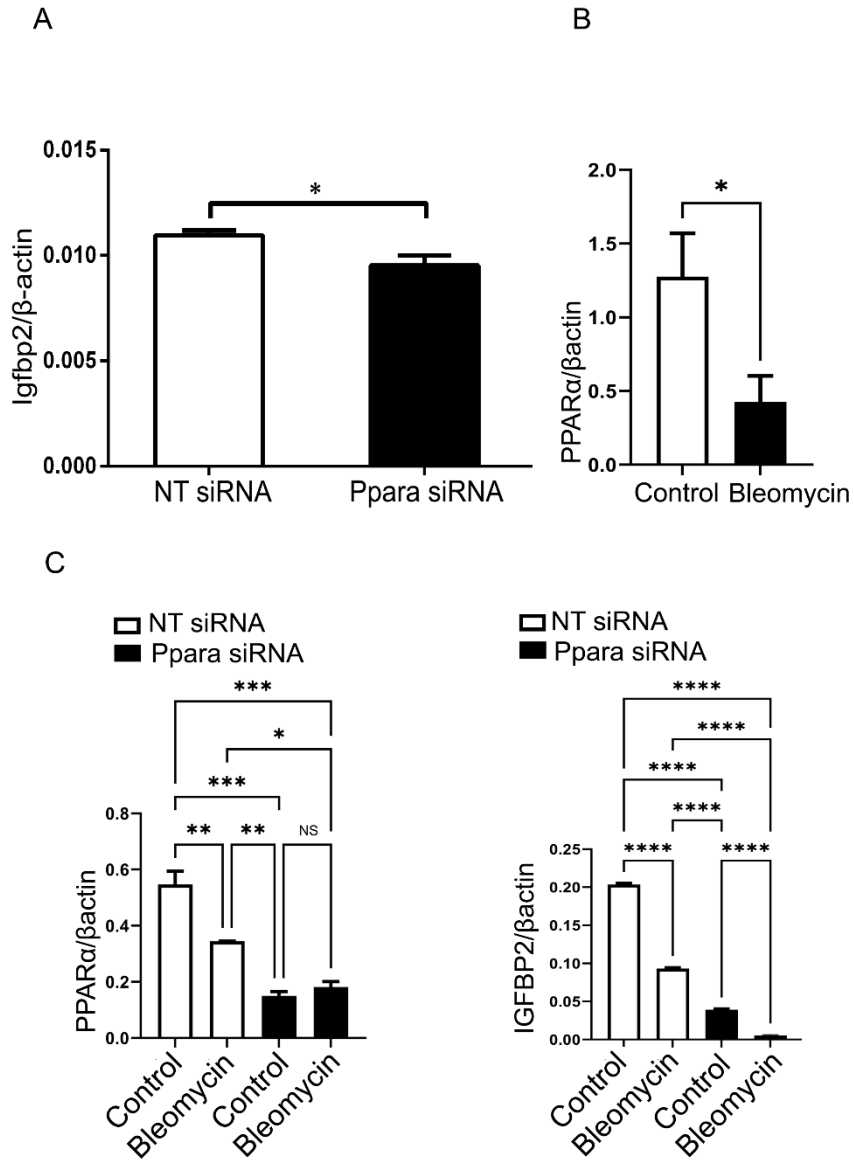

S5A – S5C. Related to Figure 5. Densitometric analysis of the Western blot images from Figures 5A – 5B. (A) Quantitative PCR analysis of Igfbp2 mRNA expression in MLE-12 cells treated with non-targeting or Ppara siRNA. (B - C) Densitometric analysis of the Western blot images from Figures 5A – 5B. The quantification by densitometric analysis through normalization to  $\beta$ -actin, expressed as fold change relative to control. Data are shown as mean  $\pm$  s.e.m. NS, not significant; one-way ANOVA with Tukey post-hoc test (for multiple comparisons) or Student's unpaired two-tailed *t* test (for two comparisons). \*P < 0.05, \*\*P < 0.01, \*\*\*P < 0.001, \*\*\*\*P < 0.0001.

Figure S6

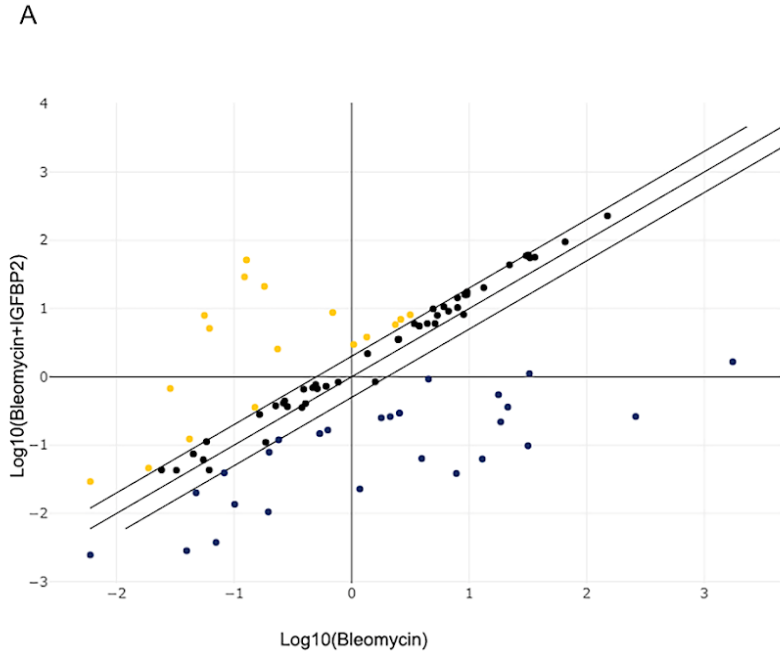

B

| Gene Symbol | Up-Regulation |
|-------------|---------------|
| Abl1        | 2.46          |
| Akt1        | 236.58        |
| Ccna2       | 2.95          |
| Ccnd1       | 2.38          |
| Cdkn2a      | 23.59         |
| Cdkn2c      | 2.86          |
| Cdkn2d      | 2.46          |
| Ets1        | 82.91         |
| Igfbp7      | 2.66          |
| Irf7        | 2.58          |
| Mapk14      | 116.55        |
| Myc         | 141.95        |
| Prkcd       | 402.99        |
| Rb1         | 12.66         |
| Serpine1    | 10.88         |
| Twist1      | 4.89          |

| Gene Symbol | Down-Regulation |
|-------------|-----------------|
| Aldh1a3     | -2.37           |
| Ccnb1       | -7.13           |
| Cdkn1b      | -59.08          |
| E2f3        | -51.58          |
| Egr1        | -8.67           |
| Gadd45a     | -8.16           |
| Gsk3b       | -2.00           |
| Id1         | -62.09          |
| Igf1        | -202.20         |
| Igf1r       | -2.10           |
| Igfbp5      | -206.52         |
| Irf5        | -32.46          |
| Mdm2        | -84.71          |
| Nox4        | -2.43           |
| Pcna        | -3.78           |
| Pik3ca      | -2.52           |
| Plau        | -18.56          |
| Sod1        | -323.24         |
| Tbx2        | -18.66          |
| Tbx3        | -13.90          |
| Tgfb1       | -29.27          |
| Tgfb1i1     | -7.44           |
| Trp53       | -3.63           |
| Vim         | -994.82         |

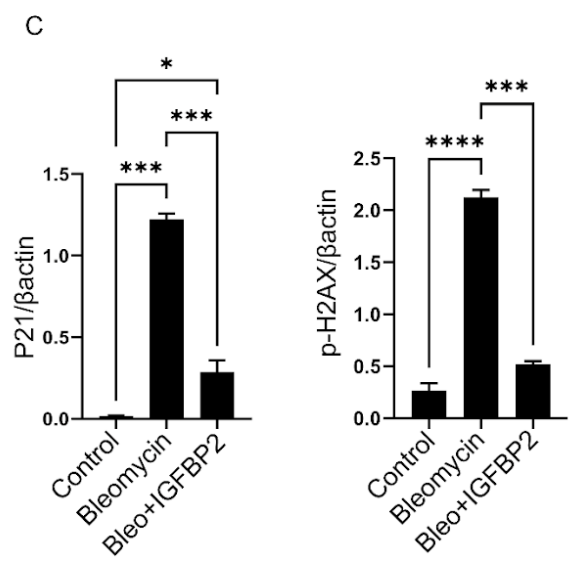

S6. Cellular senescence gene profiling in primary AEC2 cells of aged wild-type mice treated with recombinant IGFBP2 protein after bleomycin injury. (A) Scatter plot showing the RT2 Profiler PCR Array for 84 genes related to cellular senescence pathways performed in the primary AEC2 cells of aged WT mice exposed to bleomycin treated with or without recombinant IGFBP2, containing curosurf by intranasal instillation at 14 days. (B) Table showing the list of fold change upregulated and down regulated genes in the primary murine AEC2 cells. (n = 3 bleomycin; n = 3 bleomycin + IGFBP2) (C) Related to Figure 6. Densitometric analysis of the Western blot images from Figure 6F. The quantification by densitometric analysis through normalization to  $\beta$ -actin, expressed as fold change relative to control. Data are shown as mean  $\pm$  s.e.m. \*P < 0.05, \*\*\*P < 0.001, \*\*\*\*P < 0.0001, one-way ANOVA with Tukey post-hoc test.

Figure S7

A

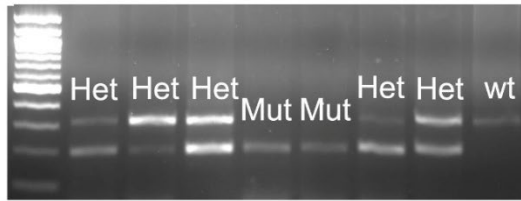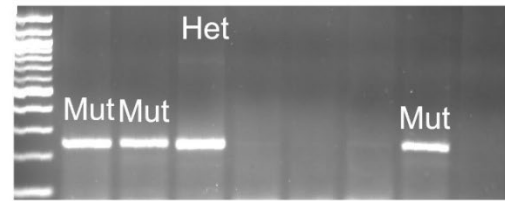

B

*Igfbp2* *fx/fx*<sup>SPC.CreERT2-</sup>

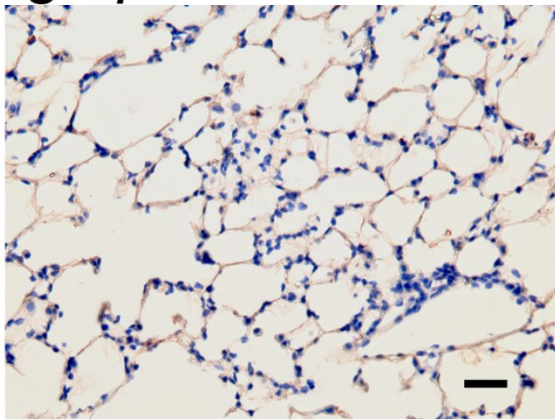

*Igfbp2* Tg<sup>SPC.CreERT2+</sup>

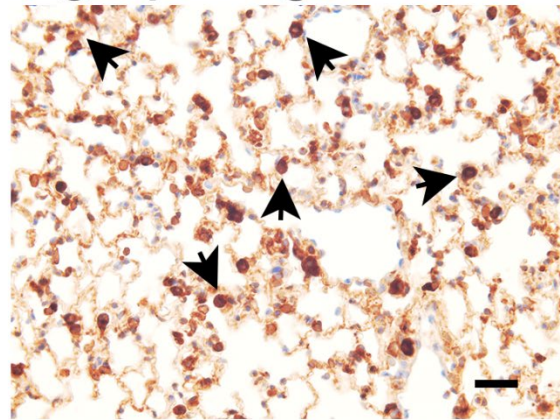

S7. Related to Figure 7A – 7G. Validation of Igfbp2 transgenic mice. (A) Genotyping of Igfbp2 transgenic mice (B) Immunohistochemistry of lung sections from Igfbp2 fx/fx and Igfbp2 Tg mice showing IGFBP2 staining in AEC2 cells after tamoxifen administration. Scale bars, 50  $\mu$ m. Black arrowheads highlight IGFBP2 expression in AEC2 cells.

Figure S8

A

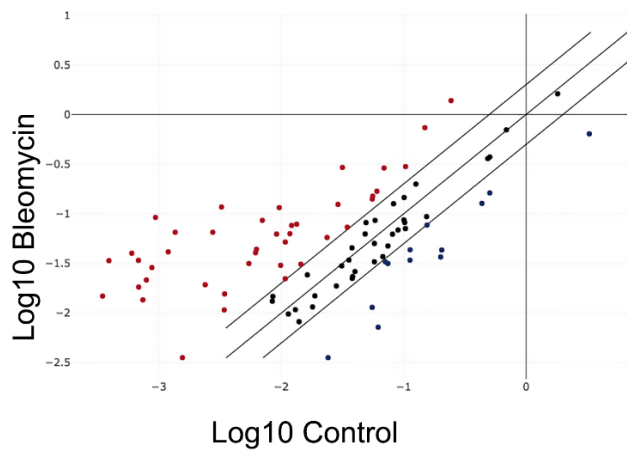

B

| Gene Symbol | Upregulation |
|-------------|--------------|
| ABL1        | 12.00        |
| ALDH1A3     | 66.70        |
| ATM         | 2.28         |
| CCNA2       | 5.80         |
| CCNB1       | 34.64        |
| CCNE1       | 47.93        |
| CDC25C      | 86.17        |
| CDK2        | 2.06         |
| CDK4        | 4.19         |
| CDKN2A      | 26.72        |
| CDKN2B      | 9.28         |
| CHEK1       | 27.21        |
| CHEK2       | 18.37        |
| COL1A1      | 2.89         |
| COL3A1      | 4.95         |
| E2F1        | 36.05        |
| E2F3        | 4.53         |
| GLB1        | 6.58         |
| GSK3B       | 2.79         |
| HRAS        | 2.70         |
| IFNG        | 42.76        |
| IGF1        | 12.25        |
| IGF1R       | 2.54         |
| IRF5        | 4.81         |
| IRF7        | 3.06         |
| MAP2K6      | 3.14         |
| MYC         | 23.64        |
| PLAU        | 8.07         |
| PRKCD       | 2.12         |
| RB1         | 2.44         |
| RBL1        | 5.36         |
| RBL2        | 2.15         |
| SERPINB2    | 32.77        |
| TBX3        | 7.01         |
| TERF2       | 6.28         |
| TERT        | 97.93        |
| TP53        | 6.83         |
| TP53BP1     | 5.87         |
| TWIST1      | 49.83        |

| Gene Symbol | Downregulation |
|-------------|----------------|
| CDKN1B      | -2.15          |
| CITED2      | -4.84          |
| ETS1        | -2.60          |
| ETS2        | -2.35          |
| ID1         | -4.74          |
| IGFBP5      | -5.46          |
| IGFBP7      | -3.11          |
| ING1        | -6.79          |
| MAP2K3      | -8.58          |
| SOD1        | -2.01          |
| SOD2        | -3.30          |
| VIM         | -3.42          |



S8. Related to Figure 7. Cellular senescence gene profiling in lungs of aged Igfbp2 floxed mice subjected to bleomycin injury. (A) Scatter plot showing the RT2 Profiler PCR Array for 84 genes related to cellular senescence pathways performed in the lungs of aged Igfbp2 floxed mice subjected to low-dose bleomycin injury. Red dots indicate upregulated genes; black dots indicate no change; blue dots indicate downregulated genes. (B) Table showing the list of fold upregulated and down regulated genes in the total lungs challenged with bleomycin compared to normal saline (n = 3 saline control; n = 3 bleomycin).

Figure S9

A

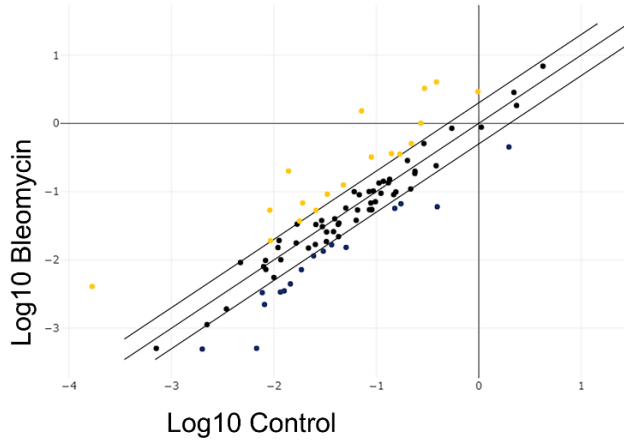

B

| Gene Symbol | Up Regulation |
|-------------|---------------|
| Ccnd1       | 2.3           |
| Cdkn1a      | 2.09          |
| Cdkn2b      | 14.45         |
| Chek1       | 24.35         |
| Col1a1      | 3.69          |
| Col3a1      | 10.45         |
| Creg1       | 3.6           |
| E2f1        | 2.06          |
| Fn1         | 21.28         |
| Glb1        | 2.09          |
| Id1         | 2.57          |
| Igf1        | 2.63          |
| Igfbp7      | 2.97          |
| Nox4        | 5.87          |
| Serpine1    | 2.08          |
| Sparc       | 11.05         |

| Gene Symbol | Down Regulation |
|-------------|-----------------|
| Abi1        | -2.58           |
| Aldh1a3     | -2.32           |
| Egr1        | -2.66           |
| Ifng        | -4.04           |
| Igfbp3      | -2.62           |
| Igfbp5      | -6.55           |
| Map2k6      | -3.43           |
| Morc3       | -2.14           |
| Myc         | -2.26           |
| Rbl2        | -3.25           |
| Serpine2    | -3.59           |
| Tert        | -13.34          |
| Trp53       | -2.2            |
| Trp53bp1    | -3.32           |
| Twist1      | -3.64           |

C

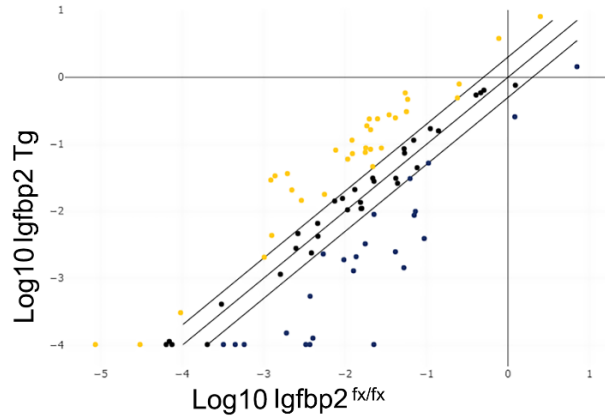

D

| Gene Symbol | Up Regulation |
|-------------|---------------|
| Aldh1a3     | 11.95         |
| Atm         | 2.03          |
| Bmi1        | 9.47          |
| Calr        | 4.91          |
| Ccna2       | 12.04         |
| Ccnb1       | 10.67         |
| Ccnd1       | 4.92          |
| Ccne1       | 4.99          |
| Cdc25c      | 18.62         |
| Cdk2        | 4.28          |
| Cdk6        | 2.12          |
| Cdkn1b      | 7.98          |
| Cdkn2a      | 23.83         |
| Cdkn2b      | 24.44         |
| Chek1       | 3.47          |
| Cited2      | 3.15          |
| Creg1       | 3.15          |
| Gsk3b       | 9.57          |
| Igfbp3      | 3.38          |
| Irf3        | 4.10          |
| Map2k6      | 9.36          |
| Mdm2        | 7.92          |
| Nbn         | 3.20          |
| Pik3ca      | 5.89          |
| Pten        | 10.67         |
| Rb1         | 10.17         |
| Rbl1        | 8.03          |
| Sod1        | 5.98          |
| Sod2        | 5.41          |
| Tert        | 3.21          |
| Tgfb1       | 2.05          |
| Trp53       | 5.57          |

| Gene Symbol | Down Regulation |
|-------------|-----------------|
| Akt1        | -23.85          |
| Cdkn1a      | -8.09           |
| Chek2       | -4.36           |
| E2f1        | -12.49          |
| Fn1         | -4.72           |
| Gadd45a     | -5.12           |
| Ifng        | -2.34           |
| Igf1r       | -32.05          |
| Igfbp5      | -3.12           |
| Igfbp7      | -35.92          |
| Ing1        | -6.51           |
| Irf5        | -36.66          |
| Irf7        | -219.06         |
| Map2k1      | -2.04           |
| Pcna        | -2.02           |
| Plau        | -5.41           |
| Prkcd       | -7.34           |
| Rbl2        | -9.83           |
| Serpine1    | -2.52           |
| Sparc       | -31.43          |
| Tgfb1i1     | -5.62           |
| Thbs1       | -16.66          |
| Trp53bp1    | -6.90           |

S9. Related to Figure 7. Cellular senescence gene profiling in primary AEC2 cells of aged wild-type and human-*Igfbp2* transgenic mice (A) Scatter plot showing the upregulated and downregulated genes relevant to senescence pathway in primary AEC2 cells from aged wild-type mice after 14 days of low-dose bleomycin treatment. (B) Table showing the list of relevant fold regulated genes with gene symbol. (C) Scatter plot showing the upregulated and downregulated genes relevant to senescence pathway in primary AEC2 cells from aged human-*Igfbp2* transgenic mice after 14 days of low-dose bleomycin treatment. Yellow dots indicate upregulated genes; black dots indicate no change; blue dots indicate downregulated genes. (D) Table showing the list of fold regulated genes with gene symbol. + indicates upregulated genes; - indicates downregulated genes. (n = 3 *Igfbp2* fx/fx; n = 3 *Igfbp2* Tg)

Figure S10

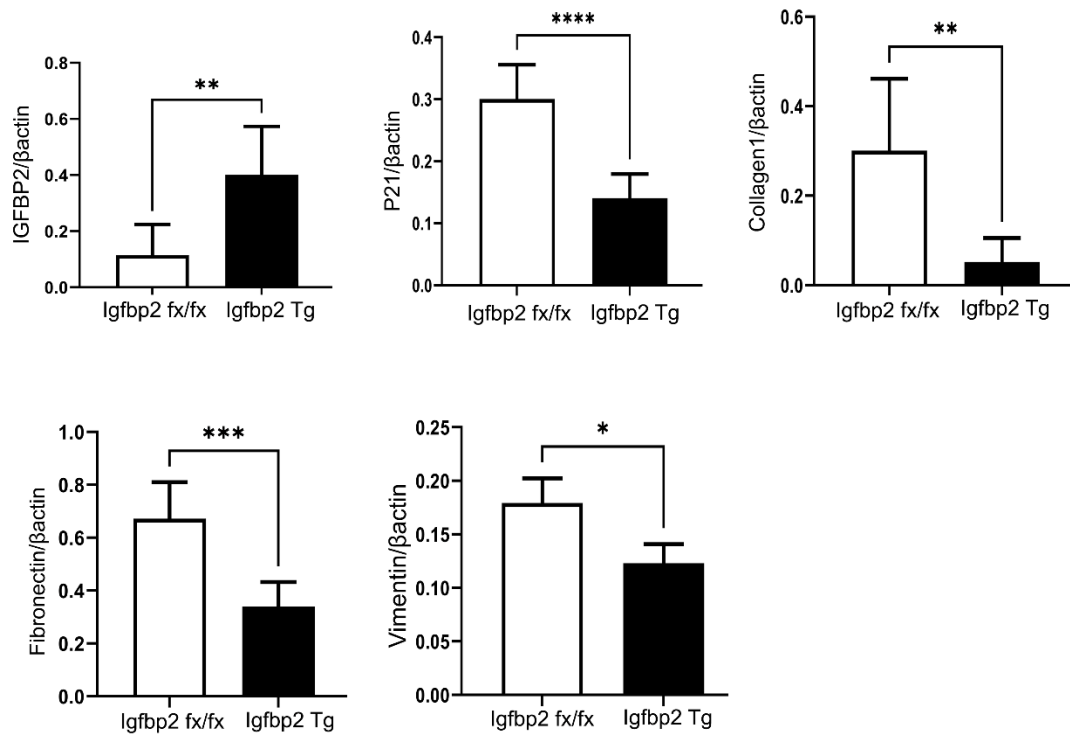

S10. Related to Figure 7. Densitometric analysis of the Western blot images from Figure 7D. The quantification by densitometric analysis through normalization to  $\beta$ -actin, expressed as fold change relative to control. Data are shown as mean  $\pm$  s.e.m. \*\*P < 0.01, \*\*\*P < 0.001, \*\*\*\*P < 0.0001, Student's unpaired two-tailed *t* test.

Figure S11

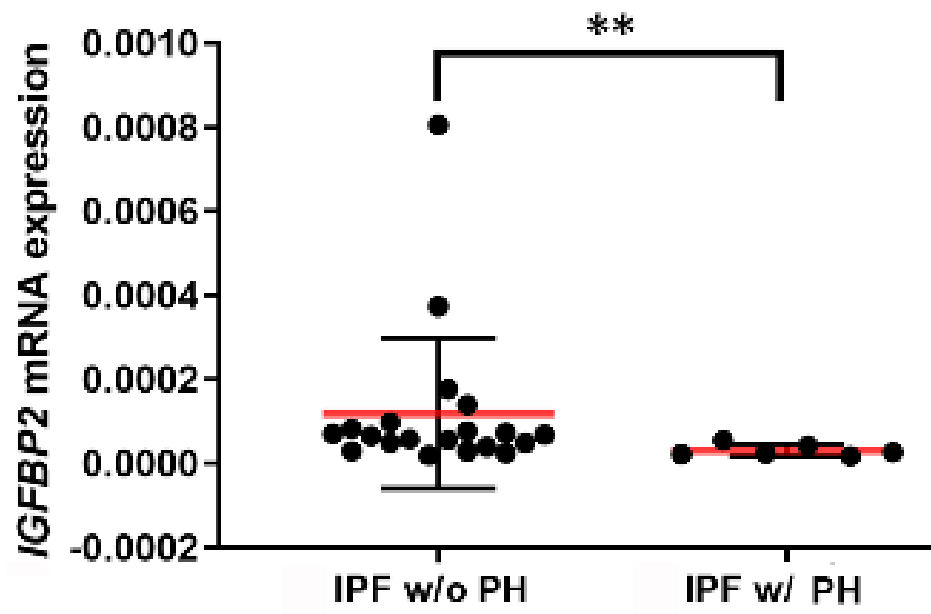

S11. Related to Figure 8. IGFBP2 mRNA expression determined by qPCR in the primary AEC2 cells obtained from fibrotic lung regions of IPF patients with pulmonary hypertension (MPAP < 30 mmHg) as compared to IPF patients with pulmonary hypertension (MPAP > 30 mmHg). Data are shown as mean  $\pm$  s.e.m. **\*\*P < 0.01**, Student's unpaired two-tailed *t* test.
